# Supplementary material
Source: MDPI journal article supplement (https://www.mdpi.com/2073-4441/14/9/1372)
Supplement: s1 [file s1]

Supplementary materials

# Comparison of Disinfection By-Product Formation and Distribution during Breakpoint Chlorination and Chlorine-Based Disinfection in Drinking Water

Dávid Stefán <sup>1,2</sup>, Judit Balogh <sup>3</sup>, Gyula Záray <sup>1,4</sup> and Márta Vargha <sup>2,\*</sup>

**Table S1.** Main operational differences between chlorination technologies used for disinfection and breakpoint chlorination.

|                                          | Breakpoint chlorination                 | Disinfection                                 |
|------------------------------------------|-----------------------------------------|----------------------------------------------|
| Contact time                             | minutes                                 | hours to days                                |
| Temperature                              | constant                                | variable (seasonally)                        |
| Cl <sub>2</sub> dosage                   | ~ 1.0–5.0 mg Cl <sub>2</sub> /L         | ~ 0.3–1.0 mg Cl <sub>2</sub> /L              |
| Br <sup>−</sup> to Cl <sub>2</sub> ratio | relatively low                          | relatively high                              |
| Possible removal of DBPs                 | GAC or BAC<br>adsorption/biodegradation | biodegradation on the distribution<br>system |

**Table S2.** Technology parameters of GAC adsorption at the investigated waterworks.

| Waterwork | Reactor volume    | Surface of sorbent | Water production    | Filtration velocity | Contact time |
|-----------|-------------------|--------------------|---------------------|---------------------|--------------|
|           | (m <sup>3</sup> ) | (m <sup>2</sup> )  | (m <sup>3</sup> /h) | (m/h)               | (min)        |
| A         | 2.0               | 1.8                | 21                  | 11.7                | 5.7          |
| B         | 1.5               | 1.2                | 12                  | 10.5                | 7.5          |
| C         | 0.4               | 0.28               | 3.6                 | 12.9                | 6.7          |

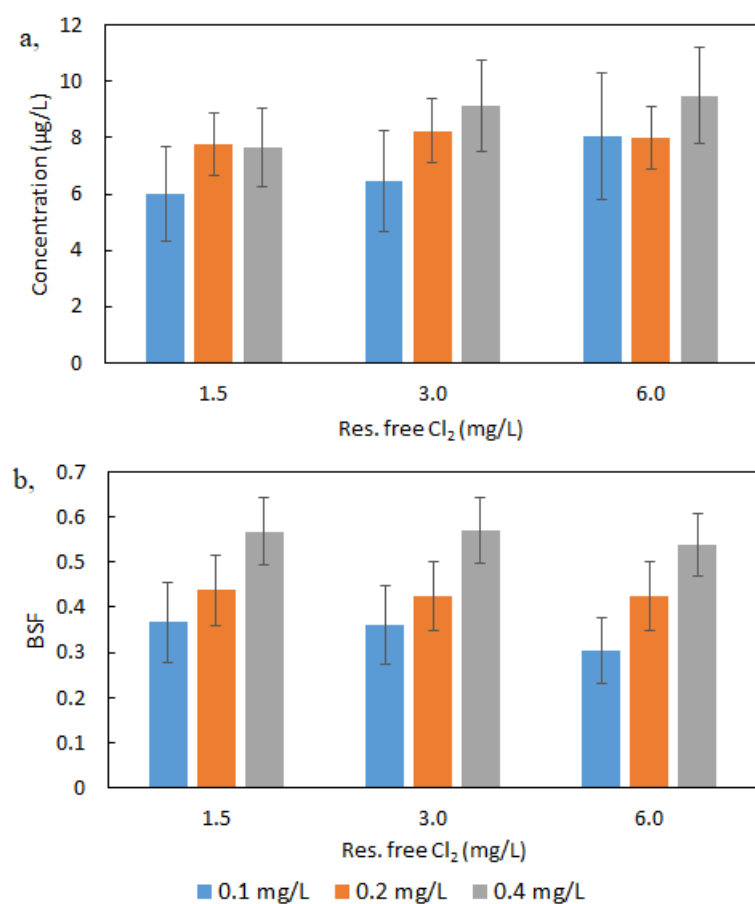

**Figure S1.** The effect of raw water  $\text{Br}^-$  and res. free  $\text{Cl}_2$  on the (a) concentration and (b) distribution of DHAAs during BC.

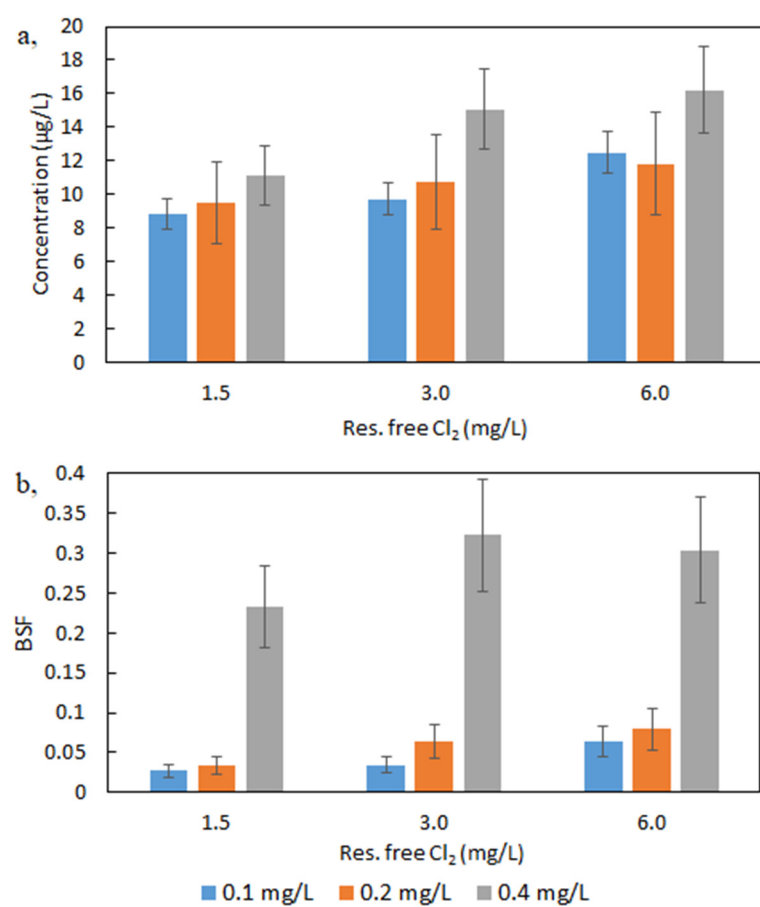

**Figure S2.** The effect of raw water  $\text{Br}^-$  and res. free  $\text{Cl}_2$  on the (a) concentration and (b) distribution of THAAs during BC.

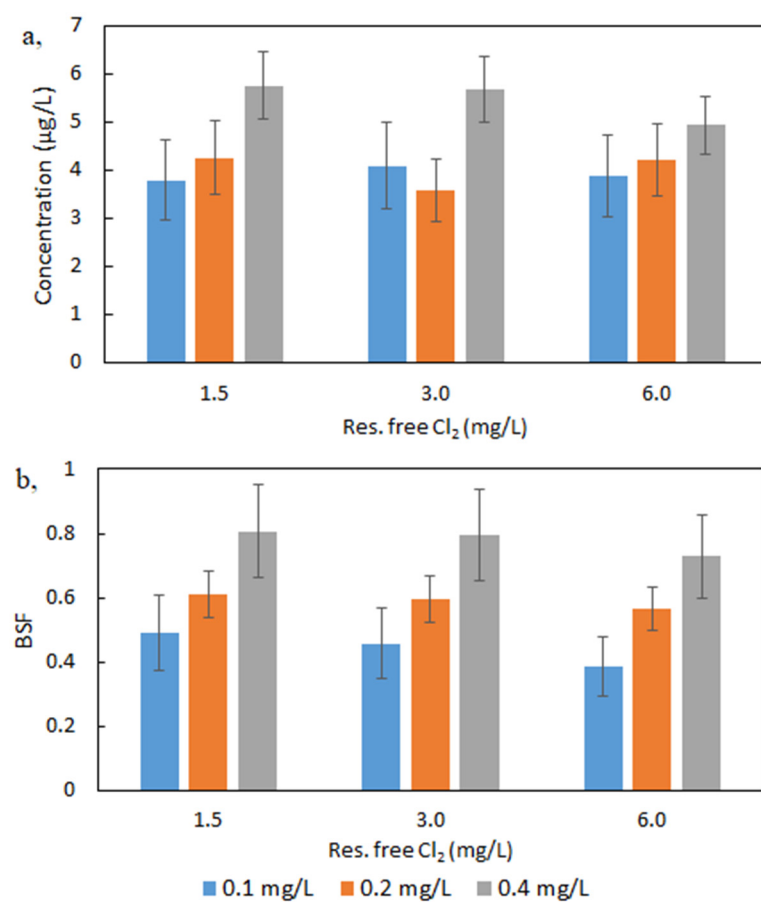

**Figure S3.** The effect of raw water  $\text{Br}^-$  and res. free  $\text{Cl}_2$  on the (a) concentration and (b) distribution of DHANs during BC.

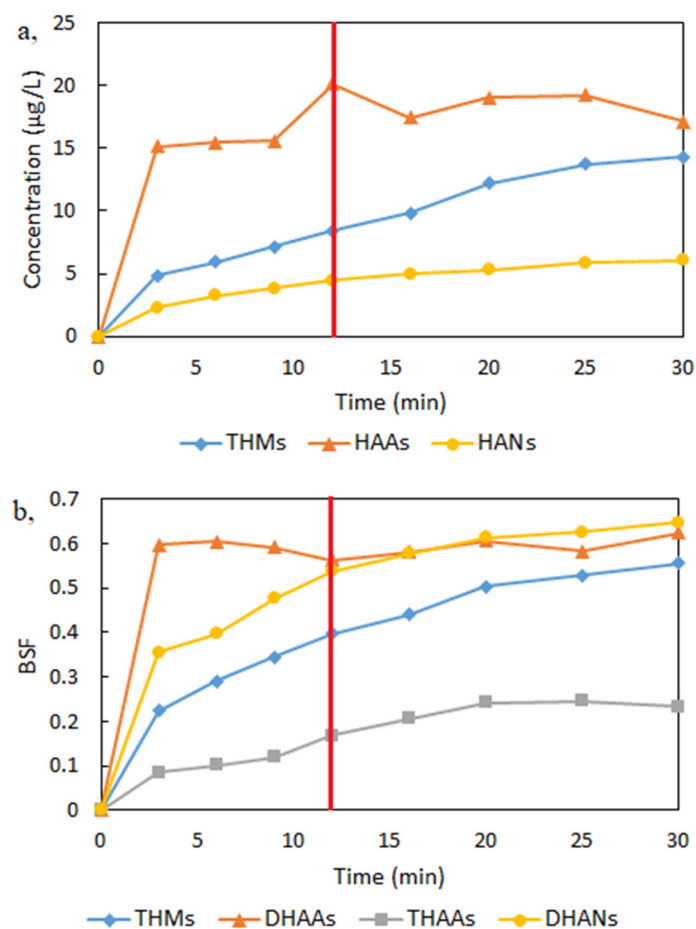

**Figure S4.** The (a) concentration and (b) distribution of DBPs in time during bench scale BC experiments (red line indicates the estimated time when breakpoint reaction is complete).

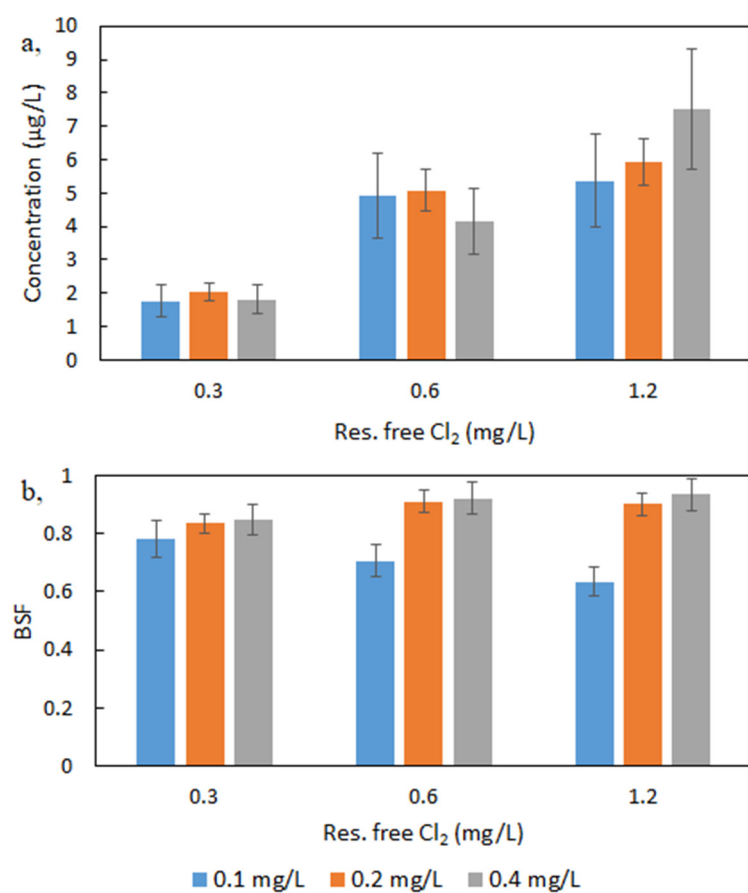

**Figure S5.** The effect of raw water  $\text{Br}^-$  and residual free  $\text{Cl}_2$  on the (a) concentration and (b) distribution of DHAAs at bench scale disinfection experiments.

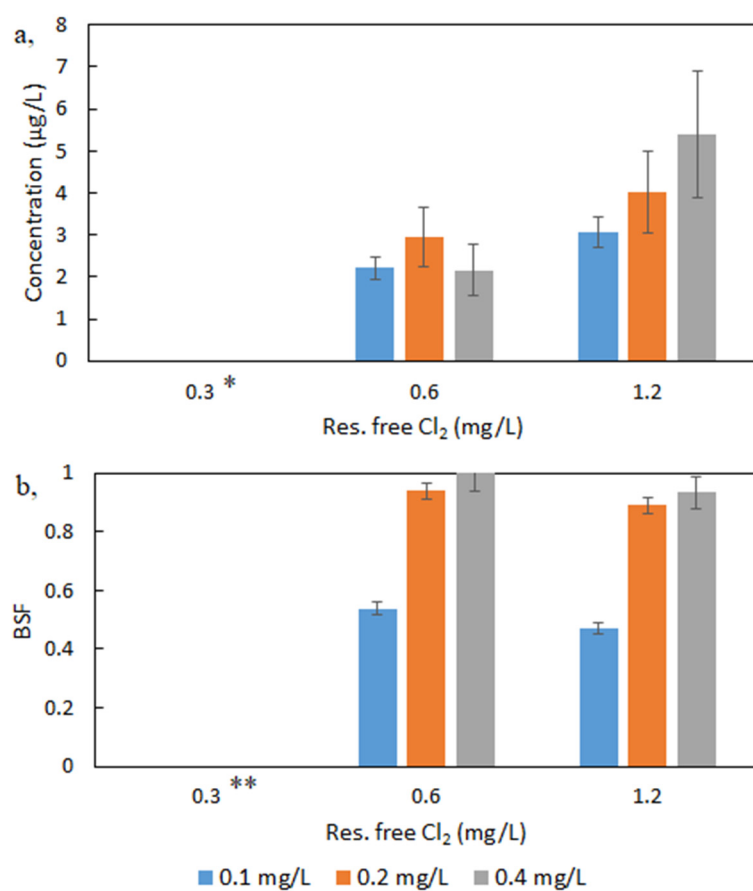

\*: concentrations are under LOQ

\*\*: BSF cannot be calculated because of the concentrations are under LOQ

**Figure S6.** The effect of raw water  $\text{Br}^-$  and residual free  $\text{Cl}_2$  on the (a) concentration and (b) distribution of THAAs at bench scale disinfection experiments.

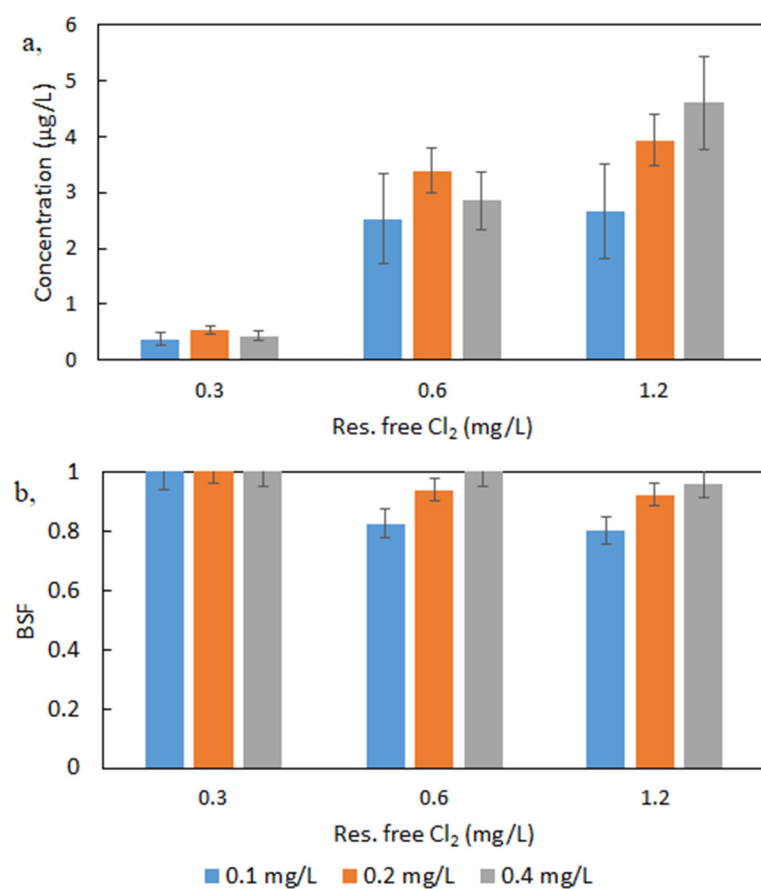

**Figure S7.** The effect of raw water  $\text{Br}^-$  and residual free  $\text{Cl}_2$  on the (a) concentration and (b) distribution of DHANs at bench scale disinfection experiments.
